# Supplementary material for: The Regular Consumption of Nuts Is Associated with a Lower Prevalence of Abdominal Obesity and Metabolic Syndrome in Older People from the North of Spain
Source: MDPI journal article supplement (doi:10.3390/ijerph19031256), 2022-01-23
Supplement: s1 [file s1]

**Table S1.** Prevalence of BMI, metabolic syndrome and its components by gender.

|                             | <b>Men<br/>(N=103)</b> | <b>Women<br/>(N=161)</b> | <b>p-value<sup>1</sup></b> | <b>Total<br/>(N=264)</b> |
|-----------------------------|------------------------|--------------------------|----------------------------|--------------------------|
|                             | <b>n (%)</b>           | <b>n (%)</b>             |                            | <b>n (%)</b>             |
| <b>Metabolic syndrome</b>   | 49 (47.6)              | 57 (35.4)                | 0.049                      | 106 (40.2)               |
| <b>Abdominal obesity</b>    | 80 (77.7)              | 128 (79.5)               | 0.722                      | 208 (78.8)               |
| <b>Hypertension</b>         | 89 (86.4)              | 121 (75.2)               | 0.027                      | 210 (79.5)               |
| <b>Hiperglycaemia</b>       | 47 (45.6)              | 37 (23.0)                | <0.001                     | 84 (31.8)                |
| <b>Hypertriglyceridemia</b> | 21 (20.4)              | 38 (23.6)                | 0.541                      | 59 (22.3)                |
| <b>Low HDL-c</b>            | 21 (20.4)              | 31 (19.3)                | 0.821                      | 52 (19.7)                |
| <b>Normal weight</b>        | 13 (12.6)              | 51 (31.7)                | <0.001                     | 64 (24.2)                |
| <b>Overweight</b>           | 62 (60.2)              | 70 (43.5)                | 0.008                      | 132 (50.0)               |
| <b>Obesity</b>              | 28 (27.2)              | 40 (24.8)                | 0.664                      | 68 (25.8)                |

<sup>1</sup>Differences between gender were evaluated using the Pearson Chi square Goodness-of-Fit test.

**Table S2.** Percentage of number of variables diagnosing metabolic syndrome (hypertension, hyperglycaemia, hypertriglyceridemia and low HDL-c) by gender.

| <b>Number of<br/>variables MetS</b> | <b>Men<br/>(N=103)</b> | <b>Women<br/>(N=161)</b> | <b>p-value<sup>1</sup></b> | <b>Total<br/>(N=264)</b> |
|-------------------------------------|------------------------|--------------------------|----------------------------|--------------------------|
|                                     | <b>n (%)</b>           | <b>n (%)</b>             |                            | <b>n (%)</b>             |
| <b>none</b>                         | 6 (5.8)                | 32 (19.9)                | 0.002                      | 38 (14.4)                |
| <b>1</b>                            | 28 (27.2)              | 74 (46.0)                | 0.002                      | 102 (38.6)               |
| <b>2</b>                            | 37 (35.9)              | 36 (22.4)                | 0.017                      | 73 (27.6)                |
| <b>3</b>                            | 23 (22.3)              | 17 (10.6)                | <0.009                     | 40 (15.2)                |
| <b>4</b>                            | 9 (8.7)                | 2 (1.2)                  | 0.010                      | 11 (4.2)                 |

<sup>1</sup>Differences between gender were evaluated using the Pearson Chi square Goodness-of-Fit test
